# Supplementary material
Source: PubMed Central journal article supplement (PMC6182114)
Supplement: supp_6.3.E423_2018-0015-1-at.pdf [file supp_6.3.E423_2018-0015-1-at.pdf]

## Appendix 1 (as supplied by the authors): Survey tool

Please check the appropriate box or fill in the blank unless otherwise instructed.

**1. What day of the week is it?**

- |                                    |                                   |
|------------------------------------|-----------------------------------|
| <input type="checkbox"/> Sunday    | <input type="checkbox"/> Thursday |
| <input type="checkbox"/> Monday    | <input type="checkbox"/> Friday   |
| <input type="checkbox"/> Tuesday   | <input type="checkbox"/> Saturday |
| <input type="checkbox"/> Wednesday |                                   |

**2. Is today a statutory (bank) holiday?**

- Yes  No

**3. What time is it now?**

- 8:00am – 4:59pm  
 5:00pm – 11:59pm  
 Midnight – 7:59am

**4. How many days old is your baby? \_\_\_\_\_ days**

**5. What is the sex of your baby?**

- Boy  Girl

**6. Who is with the baby in the Emergency Room (ER)? (Check all that apply)**

- Mother  
 Father  
 Grandparent(s)  
 Other (please specify) \_\_\_\_\_

**7. Have you brought this baby to the ER before?**

- Yes  No

If yes, was it for the same problem/concern?

- Same  Different

If yes, how many days ago did you come to the ER? \_\_\_\_\_ days

**8. Have you brought any other child to the ER before?**

- Yes  No  
 Not Applicable

**9. Please indicate the extent to which you agree or disagree with each of the following statements:**

|                                             | Strongly Disagree        | Disagree                 | Agree                    | Strongly Agree           |
|---------------------------------------------|--------------------------|--------------------------|--------------------------|--------------------------|
| My baby is as healthy as other babies.      | <input type="checkbox"/> | <input type="checkbox"/> | <input type="checkbox"/> | <input type="checkbox"/> |
| My baby is more fragile than other babies.  | <input type="checkbox"/> | <input type="checkbox"/> | <input type="checkbox"/> | <input type="checkbox"/> |
| My baby gets sick easier than other babies. | <input type="checkbox"/> | <input type="checkbox"/> | <input type="checkbox"/> | <input type="checkbox"/> |
| My baby has a long-term health condition.   | <input type="checkbox"/> | <input type="checkbox"/> | <input type="checkbox"/> | <input type="checkbox"/> |

**10. Please describe your baby's problem. (Check all that apply)**

- |                                                |                                                                 |
|------------------------------------------------|-----------------------------------------------------------------|
| <input type="checkbox"/> Fever                 | <input type="checkbox"/> Redness/discharge near cord stump      |
| <input type="checkbox"/> Cough                 | <input type="checkbox"/> Trouble breathing                      |
| <input type="checkbox"/> Congestion            | <input type="checkbox"/> Problem with stool                     |
| <input type="checkbox"/> Vomiting              | <input type="checkbox"/> Problem with urine                     |
| <input type="checkbox"/> Diarrhea              | <input type="checkbox"/> Feeding problem                        |
| <input type="checkbox"/> Rash                  | <input type="checkbox"/> Jaundice/yellow colour of skin or eyes |
| <input type="checkbox"/> Sleeping problem      | <input type="checkbox"/> Crying                                 |
| <input type="checkbox"/> Possible broken bone  | <input type="checkbox"/> Allergic reaction                      |
| <input type="checkbox"/> Cut, scrape or bruise | <input type="checkbox"/> Problem with eyes/eye discharge        |
| <input type="checkbox"/> Fall                  | <input type="checkbox"/> Choked                                 |
| <input type="checkbox"/> Circumcision          | <input type="checkbox"/> Ate something s/he shouldn't have      |
| <input type="checkbox"/> Don't know            | <input type="checkbox"/> Other (please specify):                |
- 

**11. How many days have you been concerned about the problem(s) above?**

- |                                             |                                         |
|---------------------------------------------|-----------------------------------------|
| <input type="checkbox"/> Less than 24 hours | <input type="checkbox"/> 5-6 days       |
| <input type="checkbox"/> 1-2 days           | <input type="checkbox"/> 7 or more days |
| <input type="checkbox"/> 3-4 days           |                                         |

**12. In your opinion, to what extent is your baby's problem serious?**

- |                                           |                                       |
|-------------------------------------------|---------------------------------------|
| <input type="checkbox"/> Not very serious | <input type="checkbox"/> Very serious |
| <input type="checkbox"/> Serious          | <input type="checkbox"/> Not sure     |

**13. How urgently did you think your baby needed to see a Health Care Provider (doctor) for this problem?**

- Immediately
- Today
- Within a few days

**14. In your opinion, would something bad have happened to your baby in the next 24 hours if a doctor did not see him/her?**

- |                                          |                                             |
|------------------------------------------|---------------------------------------------|
| <input type="checkbox"/> Yes, definitely | <input type="checkbox"/> No, probably not   |
| <input type="checkbox"/> Yes, probably   | <input type="checkbox"/> No, definitely not |
| <input type="checkbox"/> Don't know      |                                             |

**15. How many hours did you expect to wait before seeing a doctor in the ER?**

- |                                           |                                              |
|-------------------------------------------|----------------------------------------------|
| <input type="checkbox"/> Right away       | <input type="checkbox"/> 1 to 4 hours        |
| <input type="checkbox"/> Less than 1 hour | <input type="checkbox"/> Longer than 4 hours |

16. If you had been able to get an appointment with a doctor within one of the following times, would you have still come to the ER today?

|                             | Yes | No |
|-----------------------------|-----|----|
| Appointment today           |     |    |
| Appointment within 24 hours |     |    |
| Appointment within 48 hours |     |    |
| Appointment within 5 days   |     |    |

17. Have you given any medication/tried any treatment at home for your baby's illness or injury?

- Yes  No

If yes, what have you tried? (please specify): \_\_\_\_\_

18. Did you get advice from anyone before coming to the ER?

- Yes  No

If yes, who did you receive advice from?

- Relative, friend, or neighbour  
 Baby's usual doctor  
 Office staff or nurse at doctor's office  
 Pharmacist  
 ER Staff  
 TeleHealth  
 Other (please specify): \_\_\_\_\_

If yes, what advice did you receive from this individual(s)?

- Call usual doctor  
 Treat baby at home  
 Wait and watch baby to see if the condition gets worse  
 I was given an appointment with a doctor for today  
 I was given an appointment with a doctor for \_\_\_\_\_ days from now  
 I was told to bring baby to the ER

19. Does your baby have a usual Health Care Provider?

- Yes  No

If yes, what type of Health Care Provider?

- Family Doctor  Nurse Practitioner  
 Pediatrician  Walk-in clinic  
 Midwife  Other (please specify): \_\_\_\_\_

20. If your baby has a usual doctor, have you had an appointment with him/her since taking the baby home after birth?

- Yes  No  
 Not Applicable, my baby does not have a usual doctor

If yes, how many days ago did this doctor see the baby? \_\_\_\_\_ days

21. Did you try to contact your baby's usual doctor before coming to the ER?

- Yes  No  Not Applicable

If yes, who did you speak to when you called your baby's doctor's office?

- Receptionist  Physician  
 Nurse/Nurse Practitioner  No answer/answering machine  
 Midwife  Other (please specify): \_\_\_\_\_

If yes and you had contact with your baby's doctor, there are still reasons why parents decide to come to the ER.

Select any reasons that apply (next page):

- Doctor advised to bring baby to ER  
 Doctor only offered advice over phone, I could not see him/her  
 Doctor offered an appointment, but it was not soon enough/\_\_\_\_\_ days away  
 My baby was seen by his/her doctor but not getting better or getting worse  
 I wanted a second opinion/needed further reassurance about my baby's illness or injury  
 My baby was seen by his/her doctor and referred to a specialist but I did not want to wait for an appointment  
 Other (please specify): \_\_\_\_\_

If no, there are several reasons why parents decide to come to the ER without first contacting their baby's doctor. Why did you not contact your baby's doctor before coming to the ER? Select any reasons below that apply:

- My baby does not have a usual doctor  
 I was unable to contact my baby's doctor  
 My baby's problem was more appropriate for the ER  
 My baby's doctor would have referred us to the ER anyway  
 Someone told me to bring my baby to the ER  
 I think my baby will be seen more quickly in ER  
 My baby was already seen in ER with same problem previously  
 The ER is easier to get to/more convenient than my baby's doctor's office  
 My baby will get better treatment at the ER than at his/her doctor's office  
 My baby might need tests that the ER can do but my baby's doctor's office cannot  
 Other (please specify): \_\_\_\_\_  
 Not Applicable, my baby does not have a regular doctor

22. Are you usually able to contact your baby's doctor, or someone from that practice, outside of regular hours?

- Yes  No  
 Not Applicable, my baby does not have a regular doctor  Don't know

23. How confident are you to look after a child who is sick / injured?

- Very confident  Not very confident  
 Quite confident  Not confident at all

**24. Have you received information/advice about any of the following?**  
(Check all that apply)

|                                                  | <i>At a class before birth</i> | <i>In hospital after birth</i> | <i>From my midwife</i>   | <i>From my baby's usual doctor</i> | <i>Previous Pregnancy</i> | <i>No Advice</i>         |
|--------------------------------------------------|--------------------------------|--------------------------------|--------------------------|------------------------------------|---------------------------|--------------------------|
| How much to feed my baby                         | <input type="checkbox"/>       | <input type="checkbox"/>       | <input type="checkbox"/> | <input type="checkbox"/>           | <input type="checkbox"/>  | <input type="checkbox"/> |
| How often to feed my baby                        | <input type="checkbox"/>       | <input type="checkbox"/>       | <input type="checkbox"/> | <input type="checkbox"/>           | <input type="checkbox"/>  | <input type="checkbox"/> |
| How much/long my baby should sleep               | <input type="checkbox"/>       | <input type="checkbox"/>       | <input type="checkbox"/> | <input type="checkbox"/>           | <input type="checkbox"/>  | <input type="checkbox"/> |
| What position my baby should sleep in            | <input type="checkbox"/>       | <input type="checkbox"/>       | <input type="checkbox"/> | <input type="checkbox"/>           | <input type="checkbox"/>  | <input type="checkbox"/> |
| My baby's car seat                               | <input type="checkbox"/>       | <input type="checkbox"/>       | <input type="checkbox"/> | <input type="checkbox"/>           | <input type="checkbox"/>  | <input type="checkbox"/> |
| How many wet (urine) diapers to expect per day   | <input type="checkbox"/>       | <input type="checkbox"/>       | <input type="checkbox"/> | <input type="checkbox"/>           | <input type="checkbox"/>  | <input type="checkbox"/> |
| How many dirty (stool) diapers to expect per day | <input type="checkbox"/>       | <input type="checkbox"/>       | <input type="checkbox"/> | <input type="checkbox"/>           | <input type="checkbox"/>  | <input type="checkbox"/> |
| Jaundice (yellow skin colouration)               | <input type="checkbox"/>       | <input type="checkbox"/>       | <input type="checkbox"/> | <input type="checkbox"/>           | <input type="checkbox"/>  | <input type="checkbox"/> |
| Crying and how to comfort my baby                | <input type="checkbox"/>       | <input type="checkbox"/>       | <input type="checkbox"/> | <input type="checkbox"/>           | <input type="checkbox"/>  | <input type="checkbox"/> |
| Normal weight loss/gain for my baby              | <input type="checkbox"/>       | <input type="checkbox"/>       | <input type="checkbox"/> | <input type="checkbox"/>           | <input type="checkbox"/>  | <input type="checkbox"/> |
| When to see doctor for well-baby check           | <input type="checkbox"/>       | <input type="checkbox"/>       | <input type="checkbox"/> | <input type="checkbox"/>           | <input type="checkbox"/>  | <input type="checkbox"/> |
| Other (please specify):                          | <input type="checkbox"/>       | <input type="checkbox"/>       | <input type="checkbox"/> | <input type="checkbox"/>           | <input type="checkbox"/>  | <input type="checkbox"/> |

**25. Did you receive any conflicting or confusing advice?**

- Yes       No

**26. Before you left the hospital after birth were you asked:**

**Whether you had a doctor for your baby?**

- Yes       No       Not applicable/born at home

**Whether you had an appointment for your baby with the doctor?**

- Yes       No       Not applicable/born at home

**27. How was your baby born?**

- Vaginally, no instruments       Cesarean section (planned)  
 Vaginally with vacuum or forceps       Cesarean section (urgent)

**28. What was the gestational age of your baby at birth?**

- Less than 35 weeks (more than 5 weeks early)  
 35 weeks – 37 weeks and 6 days (2-5 weeks early)  
 38 weeks – 41 weeks and 6 days (within 2 weeks of due date)  
 42 weeks or more (at least 2 weeks late)

**29. Did your baby spend any time in a nursery (away from your room)?**

- Yes - baby was sick/small  
 Yes - I/mother was sick  
 No, always with mom

**30. How old was your baby when s/he was discharged from hospital?**

- |                                       |                                                       |
|---------------------------------------|-------------------------------------------------------|
| <input type="checkbox"/> < 24 hours   | <input type="checkbox"/> 49-96 hours (2-4 days )      |
| <input type="checkbox"/> 24-36 hours  | <input type="checkbox"/> > 96 hours (over 4 days)     |
| <input type="checkbox"/> 37- 48 hours | <input type="checkbox"/> Not applicable/ born at home |

**31. To what extent would the following resources have been helpful to you in making a decision about bringing your baby to the ER?**

|                                                                                                                    | <i>Not at all helpful</i> | <i>Not very helpful</i>  | <i>Somewhat helpful</i>  | <i>Very helpful</i>      |
|--------------------------------------------------------------------------------------------------------------------|---------------------------|--------------------------|--------------------------|--------------------------|
| Reading material on common illnesses or problems in babies, given to you before going home with baby from hospital | <input type="checkbox"/>  | <input type="checkbox"/> | <input type="checkbox"/> | <input type="checkbox"/> |
| More information on babies from newspapers / magazines / TV / radio                                                | <input type="checkbox"/>  | <input type="checkbox"/> | <input type="checkbox"/> | <input type="checkbox"/> |
| More information about babies from the Internet                                                                    | <input type="checkbox"/>  | <input type="checkbox"/> | <input type="checkbox"/> | <input type="checkbox"/> |
| Easier access to my baby's doctor                                                                                  | <input type="checkbox"/>  | <input type="checkbox"/> | <input type="checkbox"/> | <input type="checkbox"/> |
| 24 hour telephone advice from nurses or doctors specializing in baby/child care                                    | <input type="checkbox"/>  | <input type="checkbox"/> | <input type="checkbox"/> | <input type="checkbox"/> |
| Walk in clinics with pediatric specialists                                                                         | <input type="checkbox"/>  | <input type="checkbox"/> | <input type="checkbox"/> | <input type="checkbox"/> |
| Home visits from nurses or other doctors after birth                                                               | <input type="checkbox"/>  | <input type="checkbox"/> | <input type="checkbox"/> | <input type="checkbox"/> |

**32. What is your family status?**

- Married/living with partner
- Separated/divorced, partner involved with child
- Single parent

**33. In which age category are you and your partner?**

|                   | You | Your partner |
|-------------------|-----|--------------|
| Not applicable    |     |              |
| < 20 years        |     |              |
| 20-24 years       |     |              |
| 25-29 years       |     |              |
| 30-34 years       |     |              |
| 35-39 years       |     |              |
| 40 years or older |     |              |

**34. Do you have any other children living at home?**

- Yes                                      How old are they? \_\_\_\_\_
- No

35. Which of the following applies to you and your partner? (if not applicable leave column blank)

|                                                                 | You | Your partner |
|-----------------------------------------------------------------|-----|--------------|
| Generally work full time but on parental leave                  |     |              |
| Generally work part time but on parental leave                  |     |              |
| Working full time                                               |     |              |
| Working part time                                               |     |              |
| Caring for home/family (not regularly working outside the home) |     |              |
| Long term illness or disability                                 |     |              |
| Unemployed                                                      |     |              |
| Other (please specify)                                          |     |              |

36. What is the highest level of education achieved by you and your partner? (if not applicable leave column blank)

|                                                       | You | Your partner |
|-------------------------------------------------------|-----|--------------|
| High school                                           |     |              |
| Vocational school/trade certificate or apprenticeship |     |              |
| Some college/university                               |     |              |
| College diploma                                       |     |              |
| Undergraduate degree                                  |     |              |
| Graduate degree                                       |     |              |
| Professional degree (MD, DDS, DO, LLP, teacher)       |     |              |

37. Which category includes your combined family income?

- < \$25,000/year
- \$25,000 - \$50,000/year
- \$50,000 - \$100,000/year
- > \$100,000/year
- Prefer not to say

38. Where do you currently live?

- Ontario
- Other, please specify \_\_\_\_\_

39. Is there anything else you would like to tell us?

---



---



---



---



---

**Thank you very much for taking the time to complete our survey.  
Please return it to one of the colourful survey boxes located in the ED.**
