# Supplementary material
Source: PubMed Central journal article supplement (PMC6182114)
Supplement: supp_6.3.E423_2018-0015-2-at.pdf [file supp_6.3.E423_2018-0015-2-at.pdf]

## Appendix 2 (as supplied by the authors): Characteristics of parents/guardians

|                                                       | <b>N</b> | <b>%</b> |
|-------------------------------------------------------|----------|----------|
| <b>Family status</b>                                  |          |          |
| Married/living with partner                           | 1328     | 92.1     |
| Separated/divorced, partner involved with child       | 23       | 1.6      |
| Single parent                                         | 91       | 6.3      |
| Missing                                               | 91       | -        |
| <b>Age Distribution - Respondent</b>                  |          |          |
| < 20 years                                            | 38       | 2.6      |
| 20-24 years                                           | 151      | 10.5     |
| 25-29 years                                           | 391      | 27.2     |
| 30-34 years                                           | 499      | 34.7     |
| 35-39 years                                           | 267      | 18.6     |
| 40 years or older                                     | 93       | 6.5      |
| Missing                                               | 94       | -        |
| <b>Age Distribution - Partner</b>                     |          |          |
| N/A                                                   | 20       | 1.4      |
| < 20 years                                            | 22       | 1.6      |
| 20-24 years                                           | 99       | 7.0      |
| 25-29 years                                           | 296      | 21.0     |
| 30-34 years                                           | 469      | 33.3     |
| 35-39 years                                           | 349      | 24.8     |
| 40 years or older                                     | 152      | 10.8     |
| Missing                                               | 126      | -        |
| <b>Other children living at home</b>                  |          |          |
| No                                                    | 661      | 45.6     |
| Yes                                                   | 788      | 54.4     |
| Missing                                               | 84       | -        |
| <b>Employment Status - Respondent</b>                 |          |          |
| Caring for home/family                                | 162      | 11.6     |
| On parental leave                                     | 723      | 51.8     |
| Working                                               | 249      | 17.8     |
| Other                                                 | 262      | 18.8     |
| Missing                                               | 137      | 8.9      |
| <b>Employment status - Partner</b>                    |          |          |
| Caring for home/family                                | 64       | 4.7      |
| On parental leave                                     | 305      | 22.5     |
| Working                                               | 816      | 60.1     |
| Other                                                 | 172      | 12.7     |
| Missing                                               | 176      | -        |
| <b>Highest level of education - Respondent</b>        |          |          |
| High school                                           | 216      | 15.4     |
| Vocational school/trade certificate or apprenticeship | 35       | 2.5      |
| Some college/university                               | 171      | 12.2     |
| College diploma                                       | 296      | 21.1     |
| Undergraduate degree                                  | 324      | 23.1     |
| Graduate degree                                       | 237      | 16.9     |
| Professional degree                                   | 121      | 8.6      |
| Missing                                               | 133      | -        |
| <b>Highest level of education - Partner</b>           |          |          |
| N/A                                                   | 35       | 2.6      |
| High school                                           | 213      | 15.8     |

|                                                       |     |      |
|-------------------------------------------------------|-----|------|
| Vocational school/trade certificate or apprenticeship | 69  | 5.1  |
| Some college/university                               | 121 | 9.0  |
| College diploma                                       | 309 | 22.9 |
| Undergraduate degree                                  | 268 | 19.9 |
| Graduate degree                                       | 215 | 15.9 |
| Professional degree                                   | 119 | 8.8  |
| Missing                                               | 184 | -    |
| <b>Combined income</b>                                |     |      |
| < \$25,000/year                                       | 128 | 9.0  |
| \$25,000 - \$50,000/year                              | 193 | 13.6 |
| \$50,000 - \$100,000/year                             | 394 | 27.8 |
| >\$100,000/year                                       | 448 | 31.6 |
| Prefer not to say                                     | 256 | 18.0 |
| Missing                                               | 114 | -    |
| <b>Province of Residence</b>                          |     |      |
| Ontario                                               | 889 | 85.7 |
| Quebec                                                | 132 | 12.7 |
| Other                                                 | 16  | 1.5  |
| Missing                                               | 496 | -    |
