# Supplementary material
Source: PubMed Central journal article supplement (PMC6182114)
Supplement: supp_6.3.E423_2018-0015-original-submission.pdf [file supp_6.3.E423_2018-0015-original-submission.pdf]

**CMAJ Research:****A Multicentre Survey of Parental Perspectives and Characteristics Pertaining to Neonatal Visits to Emergency Departments**

JoAnn Harrold MD, Mélissa Langevin MD, Nick Barrowman PhD, Ann E. Sprague RN PhD, Deshayne B. Fell PhD, Katherine A. Moreau PhD, Thierry Lacaze-Masmonteil MD, Suzanne Schuh MD, Gary Joubert MD, Andrea Moore MD, Tanya Solano MD, Roger L. Zemek MD, Pediatric Emergency Research Canada (PERC) Network

**Author affiliations:**

Department of Pediatrics, Children's Hospital of Eastern Ontario (Harrold, Langevin, Barrowman, Lacaze-Masmonteil, Zemek)  
Children's Hospital of Eastern Ontario Research Institute (Harrold, Barrowman, Sprague, Fell, Moreau, Zemek)  
Better Outcomes Registry and Network Ontario (Sprague)  
School of Epidemiology and Public Health, University of Ottawa (Fell)  
Faculty of Education, University of Ottawa (Moreau)  
Department of Pediatrics, Cumming School of Medicine, University of Calgary (Lacaze-Masmonteil)  
The Hospital for Sick Children (Schuh)  
University of Toronto (Schuh)  
Children's Hospital, Schulich School of Medicine and Dentistry, Western University (Joubert)  
Children's Health Research Institute (Joubert)  
Department of Pediatrics, Queens University (Moore)  
McMaster University (Solano)  
Department of Pediatrics, McMaster Children's Hospital (Solano)

**Correspondence to:** JoAnn Harrold  
Children's Hospital of Eastern Ontario  
401 Smyth Road  
Ottawa, Ontario  
K1H 8L1  
jharrold@cheo.on.ca

**Word count:** 2491

**Key words:** neonates, emergency department, pediatrics

**Competing interests:** None

**Funding:** The study was supported by an Academic Health Science Centre (AHSC) Alternate Funding Plan (AFP) Innovation grant.

## Abstract

**Background:** Parents bring neonates to emergency departments (EDs) for many reasons, often non-urgent. We examined visit characteristics and parental perspectives at Academic Health Science Centres in Ontario, to identify targets for improved efficiencies in the rate of neonatal ED visits.

**Methods:** We developed and implemented a survey that explored: characteristics of neonates and parents evaluated in ED, perspectives of parents, and health-care system use.

**Results:** 1,533 surveys were completed. Most respondents (73.9%) received advice prior to the ED visit. For 86.4%, this was from a health care provider (HCP), who frequently advised going to the ED. While 86.8% of parents reported high confidence in caring for a sick child, 42.3% were unsure of the urgency with 90.5% believing same-day attention was required. Even when parents felt the condition was not serious, 83.2% thought that same-day evaluation was important. Nearly half of respondents (44.4%) said they would have gone to their HCP with a same-day appointment, dropping to 28.1% with a next-day appointment. The most common reasons for presenting were jaundice (28.8%) and feeding issues (16.4%).

**Interpretation:** Reported confidence in caring for sick infants does not match the perceived urgency of neonatal conditions, likely contributing to ED overuse. To decrease non-urgent neonatal ED use, families need better community supports, where HCPs have the resources and confidence to deal with this vulnerable population. This system would need to be immediately responsive, providing same-day help. Education campaigns for families should be explored for common presenting complaints, such as gastrointestinal, jaundice and feeding concerns.

## **Introduction**

As emergency department (ED) visits continue to increase, health-care systems require strategies to deal with non-urgent ED use in more effective ways while refocusing limited resources on higher acuity patients. This becomes particularly complicated for infants and young children, who depend on parents to determine if urgent medical attention is required. Indeed, up to 41% of children are brought to EDs in their first year,<sup>1-7</sup> with 25-50% visiting more than once<sup>2,3,5</sup> and 49-70% presenting with non-urgent concerns.<sup>5,8,9</sup> Much less is known about neonatal visits, those within 28 days of birth, although a nationally representative study in the United States estimated that 7.6% of newborns had an ED visit within this period.<sup>10</sup> In Ontario, that could mean that of the approximately 140,000 annual births,<sup>11</sup> about 10,640 neonates may visit an ED each year, with up to 7,448 (70%) of them non-urgent.

Neonatal ED visits are often related to parental concerns inadequately addressed in the transition from hospital to home, and may occur prior to the first scheduled appointment with the primary care provider. We wanted to learn what drives these visits and if there are better alternatives. We developed and conducted a quantitative survey to explore the characteristics of newborns and their parents who attend the ED within 28 days of delivery. The survey was also designed to explore the parental perspectives on their experiences with the health care system prior to the ED visit. We believe this to be the largest multi-centre study of neonatal ED visits to date.

## **Methods**

### ***Participants***

Parents or guardians presenting with a neonate to the ED at one of five Ontario Academic Health Science Centres (AHSC) associated with the Pediatric Emergency Research Canada (PERC) Network were eligible for the survey. Families of neonates requiring resuscitation and those unable to read English or French sufficiently well to complete the survey were excluded. Surveys were distributed between December 2013 and June 2015, with all sites participating for a minimum of 6 months.

We used a convenience sampling approach with survey distribution strategies varying by site based on local ED work flow. We anticipated approximately 5,000 ED visits to the five AHSCs in a one-year period, and targeted a sample size of 1,500 completed surveys. Surveys were completed anonymously, collected locally and returned in batches to the coordinating site. Data were entered centrally into a secure research database (REDCap)<sup>12</sup> by a research assistant.

### ***Survey tool development***

Since no validated survey instrument exists for this patient population and setting, a survey was developed by researchers at the coordinating site. A widely used framework for analyzing factors associated with health care service utilization,<sup>13</sup> existing literature on reasons for and predictors of ED use in pediatrics and the expertise of the research team were used to develop the survey. We mapped each survey item to one of the following domains: environment (health care system and external environment), population (predisposing, enabling and need) and health

behaviour (personal health choices and use of health services). Face validity of the survey was established by expert reviewers in Pediatric Emergency Medicine and it was piloted at the coordinating site for usability, acceptability and user input. The survey was adjusted according to the pilot results and the final version was translated into French.

### ***Ethics***

Each participating site obtained Research Ethics Board approval for the study. All participant responses remained confidential and only aggregate data are reported. In all centres, eligible parents received a survey along with a cover letter explaining voluntary participation in the study and that returning the completed study implied consent.

### ***Analysis***

All data analyses were performed using the R language version 3.3.1.<sup>14</sup> The primary analysis entailed a descriptive summary of characteristics of neonates and parents visiting the ED, using frequencies and percentages. Demographic characteristics of eligible and surveyed ED visits were assessed and compared using Pearson's chi-squared test or Fisher's exact test as appropriate. Two-sided p-values less than 0.05 were considered statistically significant. Exploratory secondary data analysis was done to examine potential correlations of variables after reviewing the results of the primary analysis.

### **Results**

A total of 1,533 completed surveys were received from 8,610 potentially eligible ED visits. Table 1 compares the surveyed population to the eligible population; the surveyed population is slightly under-represented for weekend visits and visits between midnight and 0800, but did not differ from the eligible population for age at presentation or infant sex.

### ***Participants***

Most babies were born full term, never separated from their mother and discharged within 48-hours of birth. Table 2 summarizes the characteristics of the birth and hospital stay. In describing their infant, 88.8% of parents agreed with the statement that their infant was “as healthy as other children”, while 15.8% agreed their infant was “more fragile than others”, 8.5% agreed that their infant “gets sick more easily than others” and 6.3% agreed their infant “has a long-term condition”.

The majority of participants were married, had college or university education and a family annual income of \$50,000 or more (Table 3).

### ***Health care system contact***

Among parents who reported being asked in the birth hospital whether they had a health care provider (HCP) for their baby, 80.2% said they were also asked whether they had an appointment scheduled after discharge. This indicates a missed opportunity in nearly 20% of cases to reinforce the importance of early post-discharge follow-up. On the survey, nearly all

1 families (90.6%) indicated having an HCP, which includes family doctors, pediatricians,  
2 midwives, nurse practitioners and others. The majority (76.7%) had had an appointment with  
3 their HCP between discharge from the birth hospitalization and this ED visit. Of respondents  
4 with an HCP, 35.9% reported that they could contact the office outside of regular hours.  
5  
6

7 In 8.8% of cases, parents reported having brought the baby to the ED previously and 61.2% of  
8 these repeat visits occurred for the same concern. The majority of repeat visits (74.1%) were  
9 within 7 days and 40.5% were within 2 days of the index ED visit. Recurrent visits due to the  
10 same problem occurred earlier compared to those due to a different problem ( $p=0.01$ ).  
11  
12

### 13 *Clinical issues*

14 Just over half the parents (51.7%) identified a single presenting problem, 22.6% identified two  
15 problems and 20.5% reported more than two issues. Table 4 outlines the reasons for the visit.  
16 Parents were allowed to choose as many issues as applicable and responses are grouped for  
17 clarity in the table. Jaundice, feeding, elimination problems, respiratory issues, fever and crying  
18 were the most commonly reported concerns.  
19  
20  
21  
22

### 23 *Pre-ED visit advice and family management*

24 Most respondents (73.9%) had received advice from someone before coming to the ED. In  
25 86.4% of cases, this advice came from a health care provider. A total of 46.7% of parents with a  
26 usual HCP contacted their HCP before coming to the ED and 67.5% of these parents were  
27 advised to bring the baby to ED.  
28  
29  
30

31 The most commonly reported reasons for not contacting their usual HCP included: unable to  
32 reach them, received advice to come to ED, believed the problem was more appropriate for the  
33 ED or might require tests in ED, or felt their HCP would refer them to ED anyway. Only 18.1%  
34 of families reported attempting a treatment at home (e.g., feeding, comfort measures,  
35 acetaminophen) before presenting to the ED.  
36  
37  
38

### 39 *Perceptions of severity and urgency*

40 The majority of respondents (86.8%) reported being quite or very confident to take care of a sick  
41 or injured child. This rate was higher in respondents with another child in the home versus those  
42 without (93.5% vs. 79.1%,  $p<0.001$ ).  
43  
44

45 Despite this, 42.3% of parents were not certain of the severity of their infant's condition and  
46 90.5% of these parents felt that the infant required assessment immediately/same-day; 18.1%  
47 reported that something bad may happen if the baby was not seen within 24 hours.  
48  
49

50 Even among the 16% of respondents who described their infant's condition as not very serious,  
51 83.2% still felt that same-day assessment was required and 14.9% perceived that something bad  
52 might happen if not seen within 24 hours. See Tables 5 and 6 for details of these relationships.  
53  
54

55 About half of the parents (50.8%) expected that their infant would be seen in ED within one  
56 hour.  
57  
58  
59  
60

### ***Exposure to information about babies***

Over 90% of respondents reported having received information on common infant health topics, often from multiple sources (see Table 7) and 20.5% said they'd received conflicting or confusing advice. Parents who brought their child to ED with jaundice were slightly more likely to report having received advice about jaundice compared to parents who brought their child to ED for other reasons (96.4% vs. 91.3%,  $p < 0.001$ ).

### ***Redirection to other health care resources***

We explored what additional resources were perceived as potentially useful in their decision to bring their baby to the ED, and found parents rated somewhat or very helpful:

- Walk-in clinics with pediatric specialists — 74.2%.
- 24 hour telephone advice from pediatric nurses or doctors — 73.5%.
- Easier access to baby's doctor — 72.5%.
- Postnatal home visits from nurses or doctors — 70.6%.
- Reading material provided during the birth admission — 64.7%.
- Information on the Internet — 58.8%.
- Information in newspapers/magazines or on TV/radio — 34.8%.

When asked whether an appointment with an HCP would have prevented the ED visit, 44.4% of parents said yes for a same-day appointment but only 28.1% if the appointment was within 24 hours.

## **Interpretation**

### ***Summary***

Our study provides a broad understanding of why parents bring their infants to the ED, highlighting that both parents and HCPs see neonates as in need of expedient, often same-day, care and that unilateral interventions are unlikely to be successful. The majority of parents reach out to HCPs before making a decision to come to the ED, suggesting an opportunity to direct them to other available resources. Our results also demonstrate that while parents have an opinion as to the severity of their infant's condition, they are uncertain — likely a major contributor to the decision to seek care in the ED rather than other health care settings. This is reinforced by our finding that nearly half of respondents said they would have gone to their HCP if they could be seen the same day but this dropped to just over a quarter of respondents if the appointment would be the next day.

Previous studies in pediatrics have found high rates of children having an identified primary care provider<sup>15,16</sup> and our study confirmed this for the neonatal population. We found that low acuity presentations of gastrointestinal issues, including jaundice and problems with feeding or stooling, continue to be the most frequent causes for ED visits, along with respiratory concerns,



1 crying and rash.<sup>10,17-19</sup> Also consistent with the literature,<sup>15,16,20,21</sup> repeated visits to the ED, often  
2 for the same issue, were frequent in our study despite the majority of respondents having an HCP  
3 for their baby. This may suggest that the ED consultation does not always provide complete  
4 reassurance or support for parental concerns.  
5  
6

7 The large majority of parents had seen their HCP between initial hospital discharge and the ED  
8 visit, suggesting that an early appointment did not prevent an ED consultation. This may be in  
9 part due to the fact that while most parents reported a high confidence level for taking care of a  
10 sick or injured child, a large proportion were unsure of the severity of their infant's condition and  
11 believed that it was sufficiently urgent to warrant being seen the same day. Even in cases where  
12 parents thought that their infant's condition was not serious, it was common to think that being  
13 seen the same day was important. This is consistent with the findings of others indicating that  
14 parents, including those of infants triaged as non-urgent, have difficulty discerning the urgency  
15 of the situation and frequently report it as very/extremely urgent.<sup>21,22</sup> What's more, even if the  
16 majority of parents sought advice prior to coming to ED, HCPs generally advised that the baby  
17 be seen in the ED, a trend that is well documented.<sup>15,16,20,21,23</sup>  
18  
19  
20  
21  
22

23 Parent confidence and knowledge as well as HCP direction to parents to attend the ED are both  
24 key to consider when designing interventions to decrease non-urgent neonatal ED visits.  
25 Education is often used to modify health behaviours and there is evidence that education can  
26 affect ED presentation rates in this population. For example, a provincial public health  
27 prevention program focused on crying led to a decreased rate of ED presentation in infants under  
28 5 months of age.<sup>24</sup> However, education alone may not be sufficient. Our finding that those  
29 presenting with jaundice were more likely to have received information on hyperbilirubinemia as  
30 compared to others may indicate that families were sensitized to the issue but not well informed  
31 as to where to seek care.  
32  
33  
34  
35

36 Parents in our study had generally received information on a broad range of topics and our  
37 results show that they rated human-based resources, including more ready access to physicians or  
38 nurses, as potentially more helpful than further information-based resources, regardless of  
39 format. This speaks to the potential positive impact of HCPs in the care of infants. Interventions  
40 to improve the capacity of HCPs to address non-urgent neonatal concerns when parents call  
41 should be considered. These HCPs need the skills and confidence to address the issues as well as  
42 access to resources which might be required, such as community labs capable of performing  
43 infant bloodwork with quick turnaround or lactation consultants etc.  
44  
45  
46  
47

48 Further studies are needed to determine which of the common presenting issues - such as  
49 jaundice, feeding, respiratory issues, crying and rash – may be amenable to education campaigns  
50 for families versus which will be more effectively dealt with through interventions aimed at  
51 HCPs or improving community resources.  
52  
53

### 54 ***Limitations***

55 Conducting the survey in large AHSCs may affect generalizability to more rural settings. While  
56 we know the number of completed surveys and the number of potentially eligible neonates, we  
57  
58  
59  
60

1 do not know the number of surveys distributed and cannot calculate a true response rate. Visits  
2 were counted as potentially eligible based on patient age and presenting during the study period  
3 but may not have met full eligibility criteria (e.g., language, not requiring resuscitation). There  
4 may be selection bias in those who chose to complete the survey and patients requiring  
5 resuscitation were excluded which may have decreased our numbers of more severe  
6 presentations. Comments by ED staff may have affected parents' interpretations of the  
7 seriousness of the illness compared to their decision to come to the ED. All data is self-reported  
8 and cannot be correlated to final diagnosis or HCP assessed severity.  
9  
10  
11

### 12 **Conclusion**

13  
14 Capitalizing on parents' reported confidence by providing families better supports to care for  
15 their baby at home or be seen outside the ED may decrease non-urgent ED utilization by  
16 neonates. Any such system would need to be immediately responsive, providing same-day  
17 support, to have the desired effect. Targeted interventions to decrease ED visits for  
18 gastrointestinal complaints may have a significant effect on utilization, as these were by far most  
19 common, as would community resource to ensure timely assessment for jaundice and support of  
20 feeding issues.  
21  
22  
23  
24  
25  
26  
27

### 28 **Acknowledgements**

29  
30 We thank Ottawa-based freelance editor Joan Ramsay for her assistance with this manuscript and  
31 Lubna Salman and Vid Bijelic for their work on the data analysis. Thank you to our site research  
32 assistants: Avery Yandt and Samantha Somers (Ottawa), Judy Sweeney and Maggie Rumantir  
33 (Toronto), Adriana Breen (Kingston), Cindy Langford (London), Mandy Van Goch (Hamilton).  
34  
35  
36

37 **Contributors:** All authors approved the final version of this manuscript for publication and  
38 agreed to be accountable. All authors either drafted and/or revised the work. All authors  
39 contributed to one or more of the following: i) conception/design of the work; ii) data  
40 acquisition; iii) data analysis; iv) data interpretation.  
41  
42  
43  
44  
45  
46  
47  
48  
49  
50  
51  
52  
53  
54  
55  
56  
57  
58  
59  
60



## References

1. Meara E, Kotagal UR, Atherton HD, Lieu TA. Impact of early newborn discharge legislation and early follow-up visits on infant outcomes in a state Medicaid population. *Pediatrics* 2004;113:1619-27.
2. Kotagal UR, Schoettker PJ, Atherton HD, et al. Relationship between early primary care and emergency department use in early infancy by the medicaid population. *Arch Pediatr Adolesc Med* 2002;156:710-6.
3. Sharma V, Simon SD, Bakewell JM, Ellerbeck EF, Fox MH, Wallace DD. Factors influencing infant visits to emergency departments. *Pediatrics* 2000;106:1031-9.
4. Madden JM, Soumerai SB, Lieu TA, Mandl KD, Zhang F, Ross-Degnan D. Effects of a law against early postpartum discharge on newborn follow-up, adverse events, and HMO expenditures. *N Engl J Med* 2002;347:2031-8.
5. Pomerantz WJ, Schubert CJ, Atherton HD, Kotagal UR. Characteristics of nonurgent emergency department use in the first 3 months of life. *Pediatr Emerg Care* 2002;18:403-8.
6. Kotagal UR, Atherton HD, Bragg E, Lippert C, Donovan EF, Perlstein PH. Use of hospital-based services in the first three months of life: impact of an early discharge program. *J Pediatr* 1997;130:250-6.
7. Goyal NK, Folger AT, Hall ES, Ammerman RT, Van Ginkel JB, Pickler RS. Effects of home visiting and maternal mental health on use of the emergency department among late preterm infants. *J Obstet Gynecol Neonatal Nurs* 2015;44:135-44.
8. Kennedy TJT, Purcell LK, LeBlanc JC, Jangaard KA. Emergency department use by infants less than 14 days of age. *Pediatr Emerg Care* 2004;20:437-42.
9. Donovan EF, Perlstein PH, Atherton HD, Kotagal UR. Prenatal care and infant emergency department use. *Pediatr Emerg Care* 2000;16:156-9.
10. Lee HC, Bardach NS, Maselli JH, Gonzales R. Emergency department visits in the neonatal period in the United States. *Pediatr Emerg Care* 2014;30:315-8.
11. Statistics Canada. Births and total fertility rate, by province and territory (Births) [updated 2016 Oct 26; cited 2017 May 21]. Available from <http://www.statcan.gc.ca/tables-tableaux/sum-som/101/cst01/hlth85a-eng.htm>
12. Harris PA, Taylor R, Thielke R, Payne J, Gonzalez N, Conde JG. Research electronic data capture (REDCap)--a metadata-driven methodology and workflow process for providing translational research informatics support. *J Biomed Inform* 2009;42:377-381.
13. Andersen R. Behavioral Model of Families' Use of Health Services. Chicago: Center for Health Administration Studies, University of Chicago; 1968.
14. R Core Team (2017). R: A language and environment for statistical computing. R Foundation for Statistical Computing, Vienna, Austria. Available from <https://www.R-project.org/>.

- 1 15. Farion KJ, Wright M, Zemek R, et al. Understanding low-acuity visits to the pediatric  
2 emergency department. *PLOS One* 2015;10(6):e0128927. doi 10.1371/journal.pone.0128927.  
3 eCollection 2015.
- 4  
5 16. Hummel K, Mohler MJ, Clemens CJ, Duncan B. Why parents use the emergency department  
6 during evening hours for nonemergent pediatric care. *Clinical Pediatrics* 2014;53:1055-61.  
7  
8 17. O'Donnell HC, Colman G, Trachtman RA, Velazco N, Racine AD. Impact of newborn  
9 follow-up visit timing on subsequent ED visits and hospital readmissions: an instrumental  
10 variable analysis. *Academic Pediatrics* 2014;14:84-91.  
11  
12 18. Flanagan CF, Stewart M. Factors associated with early neonatal attendance to a paediatric  
13 emergency department. *Arch Dis Child* 2014;99:239-43.  
14  
15 19. Batu ED, Yeni S, Teksam O. The factors affecting neonatal presentations to the pediatric  
16 emergency department. *J Emerg Med* 2015;48:542-47.  
17  
18 20. Smith V, Justafa M, Grafstein E, Doan Q. Factors influencing the decision to attend a  
19 pediatric emergency department for nonemergent complaints. *Pediatr Emerg Care*  
20 2015;31:640-4.  
21  
22 21. Kubicek K, Liu D, Beaudin C, et al. A profile of non-urgent emergency department usage in  
23 an urban pediatric hospital. *Pediatr Emerg Care* 2012;28:977-84.  
24  
25 22. Swavely D, Baker K, Bilger K, Zimmerman DF, Martin A. Understanding nonurgent  
26 pediatric emergency department visits: using hospital and family-centric data to inform  
27 system redesign. *J Nurs Care Qual* 2015;30:366-72.  
28  
29 23. Sturm JJ, Hirsh D, Weselman B, Simon HK. Reconnecting patients with their primary care  
30 provider: an intervention for reducing nonurgent pediatric emergency department visits.  
31 *Clinical Pediatrics* 2014;53:988-94.  
32  
33 24. Barr RG, Rajabali F, Aragon M, Colbourne M, Brant R. Education about crying in normal  
34 infants is associated with a reduction in pediatric emergency room visits for crying  
35 complaints. *J Dev Behav Pediatr* 2015;36:252-7.  
36  
37  
38  
39  
40  
41  
42  
43  
44  
45  
46  
47  
48  
49  
50  
51  
52  
53  
54  
55  
56  
57  
58  
59  
60

**Table 1: Comparison of potentially eligible and included patient characteristics**

| Characteristics         | Eligible |       | Surveyed |       | Surveyed vs eligible p-value |
|-------------------------|----------|-------|----------|-------|------------------------------|
|                         | N        | %     | N        | %     |                              |
| <b>Total</b>            | 8610     | -     | 1533     | -     | -                            |
| <b>Sex</b>              |          |       |          |       | 0.53                         |
| Boy                     | 4801     | 55.8  | 836      | 54.9  |                              |
| Girl                    | 3809     | 44.2  | 688      | 45.1  |                              |
| Total                   | 8610     | 100   | 1533     | 100   |                              |
| <b>Age group (days)</b> |          |       |          |       | 0.36                         |
| 0-3                     | 1089     | 12.7  | 202      | 13.2  |                              |
| 4-7                     | 1958     | 22.8  | 371      | 24.2  |                              |
| 8-14                    | 1996     | 23.2  | 367      | 23.9  |                              |
| 15-21                   | 1786     | 20.8  | 305      | 19.9  |                              |
| 22-28                   | 1774     | 20.6  | 288      | 18.8  |                              |
| Total                   | 8603     | 100.1 | 1533     | 100   |                              |
| <b>Day of Week</b>      |          |       |          |       | 0.01                         |
| Sunday                  | 1210     | 14.1  | 163      | 10.8  |                              |
| Monday                  | 1264     | 14.7  | 245      | 16.2  |                              |
| Tuesday                 | 1160     | 13.5  | 230      | 15.2  |                              |
| Wednesday               | 1199     | 13.9  | 218      | 14.4  |                              |
| Thursday                | 1135     | 13.2  | 216      | 14.3  |                              |
| Friday                  | 1346     | 15.6  | 229      | 15.1  |                              |
| Saturday                | 1296     | 15.1  | 211      | 14    |                              |
| Total                   | 8610     | 100.1 | 1512     | 100   |                              |
| <b>Visit Time</b>       |          |       |          |       | <0.001                       |
| 8:00 am - 4:59 pm       | 3965     | 46.1  | 767      | 50.9  |                              |
| 5:00 pm - 11:59 pm      | 3387     | 39.3  | 653      | 43.3  |                              |
| Midnight - 7:59 am      | 1258     | 14.6  | 87       | 5.8   |                              |
| Total                   | 8610     | 100   | 1507     | 100   |                              |
| <b>Site</b>             |          |       |          |       | <0.001                       |
| A                       | 2303     | 26.7  | 947      | 61.8  |                              |
| B                       | 1428     | 16.6  | 185      | 12.1  |                              |
| C                       | 309      | 3.6   | 32       | 2.1   |                              |
| D                       | 178      | 2.1   | 33       | 2.2   |                              |
| E                       | 4392     | 51    | 336      | 21.9  |                              |
| Total                   | 8610     | 100   | 1533     | 100.1 |                              |

\*age of 7 patients was suppressed by one site due to small numbers

**Table 2: Characteristics of pregnancy / infant / initial hospital stay**

|                                               | N    | %    |
|-----------------------------------------------|------|------|
| <b>Type of Delivery (n=1459)</b>              |      |      |
| Cesarean                                      | 335  | 23   |
| Vaginal                                       | 1124 | 77   |
| <b>Gestational age at birth (n=1467)</b>      |      |      |
| Less than 35 weeks                            | 19   | 1.3  |
| 35 weeks - 37 weeks and 6 days                | 227  | 15.5 |
| 38 weeks - 41 weeks and 6 days                | 1202 | 81.9 |
| 42 weeks or more                              | 19   | 1.3  |
| <b>Separation of mother and baby (n=1447)</b> |      |      |
| No - always with mom                          | 1270 | 87.8 |
| Yes - baby was sick/small                     | 157  | 10.9 |
| Yes - I/mother was sick                       | 20   | 1.4  |
| <b>Length of Stay (n=1453)</b>                |      |      |
| < 24 hours                                    | 145  | 10   |
| 24 - 36 hours                                 | 510  | 35.1 |
| 37 - 48 hours                                 | 347  | 23.9 |
| 49 - 96 hours                                 | 333  | 22.9 |
| > 96 hours                                    | 72   | 5    |
| Not applicable/born at home                   | 46   | 3.2  |

Confidential

**Table 3: Characteristics of parents/guardians**

| <b>Family status</b> (n=1442)                           | <b>N</b> | <b>%</b> |
|---------------------------------------------------------|----------|----------|
| Married/living with partner                             | 1328     | 92.1     |
| Separated/divorced, partner involved with child         | 23       | 1.6      |
| Single parent                                           | 91       | 6.3      |
| <b>Age Distribution - Respondent</b> (n=1439)           |          |          |
| < 20 years                                              | 38       | 2.6      |
| 20-24 years                                             | 151      | 10.5     |
| 25-29 years                                             | 391      | 27.2     |
| 30-34 years                                             | 499      | 34.7     |
| 35-39 years                                             | 267      | 18.6     |
| 40 years or older                                       | 93       | 6.5      |
| <b>Age Distribution - Partner</b> (n=1507)              |          |          |
| N/A                                                     | 20       | 1.4      |
| < 20 years                                              | 22       | 1.6      |
| 20-24 years                                             | 99       | 7        |
| 25-29 years                                             | 296      | 21       |
| 30-34 years                                             | 469      | 33.3     |
| 35-39 years                                             | 349      | 24.8     |
| 40 years or older                                       | 152      | 10.8     |
| <b>Other children living at home</b> (n=1449)           |          |          |
| No                                                      | 661      | 45.6     |
| Yes                                                     | 788      | 54.4     |
| <b>Employment Status - Respondent</b> (n=1396)          |          |          |
| Caring for home/family                                  | 162      | 11.6     |
| On parental leave                                       | 723      | 51.8     |
| Working                                                 | 249      | 17.8     |
| Other                                                   | 262      | 18.8     |
| <b>Employment status - Partner</b> (n=1533)             |          |          |
| Caring for home/family                                  | 64       | 4.7      |
| On parental leave                                       | 305      | 22.5     |
| Working                                                 | 816      | 60.1     |
| Other                                                   | 172      | 12.7     |
| <b>Highest level of education - Respondent</b> (n=1500) |          |          |
| High school                                             | 216      | 15.4     |
| Vocational school/trade certificate or apprenticeship   | 35       | 2.5      |
| Some college/university                                 | 171      | 12.2     |
| College diploma                                         | 296      | 21.1     |

|   |                      |     |      |
|---|----------------------|-----|------|
| 1 | Undergraduate degree | 324 | 23.1 |
| 2 | Graduate degree      | 237 | 16.9 |
| 3 | Professional degree  | 121 | 8.6  |
| 4 |                      |     |      |
| 5 |                      |     |      |

6 **Highest level of education - Partner (n=1449)**

|    |                                                       |     |      |
|----|-------------------------------------------------------|-----|------|
| 7  |                                                       |     |      |
| 8  | N/A                                                   | 35  | 2.6  |
| 9  | High school                                           | 213 | 15.8 |
| 10 | Vocational school/trade certificate or apprenticeship | 69  | 5.1  |
| 11 | Some college/university                               | 121 | 9    |
| 12 | College diploma                                       | 309 | 22.9 |
| 13 | Undergraduate degree                                  | 268 | 19.9 |
| 14 | Graduate degree                                       | 215 | 15.9 |
| 15 | Professional degree                                   | 119 | 8.8  |
| 16 |                                                       |     |      |
| 17 |                                                       |     |      |

18 **Combined income (n=1419)**

|    |                           |     |      |
|----|---------------------------|-----|------|
| 19 |                           |     |      |
| 20 | < \$25,000/year           | 128 | 9    |
| 21 | \$25,000 - \$50,000/year  | 193 | 13.6 |
| 22 | \$50,000 - \$100,000/year | 394 | 27.8 |
| 23 | >\$100,000/year           | 448 | 31.6 |
| 24 | Prefer not to say         | 256 | 18   |
| 25 |                           |     |      |
| 26 |                           |     |      |

27 **Province of Residence (n=1037)**

|    |         |     |      |
|----|---------|-----|------|
| 28 |         |     |      |
| 29 | Ontario | 889 | 85.7 |
| 30 | Quebec  | 132 | 12.7 |
| 31 | Other   | 16  | 1.5  |
| 32 |         |     |      |
| 33 |         |     |      |
| 34 |         |     |      |
| 35 |         |     |      |
| 36 |         |     |      |
| 37 |         |     |      |
| 38 |         |     |      |
| 39 |         |     |      |
| 40 |         |     |      |
| 41 |         |     |      |
| 42 |         |     |      |
| 43 |         |     |      |
| 44 |         |     |      |
| 45 |         |     |      |
| 46 |         |     |      |
| 47 |         |     |      |
| 48 |         |     |      |
| 49 |         |     |      |
| 50 |         |     |      |
| 51 |         |     |      |
| 52 |         |     |      |
| 53 |         |     |      |
| 54 |         |     |      |
| 55 |         |     |      |
| 56 |         |     |      |
| 57 |         |     |      |
| 58 |         |     |      |
| 59 |         |     |      |
| 60 |         |     |      |



**Table 4: ED presenting issue(s) reported by parent/guardian**

| Diagnosis                                       | Multi-select<br>N (%) | Number of respondents who<br>selected at least one item in this<br>category (%) |
|-------------------------------------------------|-----------------------|---------------------------------------------------------------------------------|
| <b>Gastrointestinal</b>                         |                       | <b>926 (60.4)</b>                                                               |
| Jaundice / yellow colour of skin or eyes        | 441 (47.6)            |                                                                                 |
| Feeding problem                                 | 251 (27.1)            |                                                                                 |
| Vomiting                                        | 201 (21.7)            |                                                                                 |
| Problem with stool                              | 179 (19.3)            |                                                                                 |
| Diarrhea                                        | 109 (11.8)            |                                                                                 |
| Ate something s/he shouldn't have               | 1 (0.1)               |                                                                                 |
| <b>Respiratory</b>                              |                       | <b>403 (26.3)</b>                                                               |
| Congestion                                      | 249 (61.8)            |                                                                                 |
| Trouble breathing                               | 222 (55.1)            |                                                                                 |
| Cough                                           | 190 (47.1)            |                                                                                 |
| Choked                                          | 31 (7.7)              |                                                                                 |
| Apnea / ALTE                                    | 6 (1.5)               |                                                                                 |
| <b>Neurological</b>                             |                       | <b>16 (1.0)</b>                                                                 |
| Shaking / tremor / seizure                      | 16 (100.0)            |                                                                                 |
| <b>Trauma</b>                                   |                       | <b>70 (4.6)</b>                                                                 |
| Lump / bump / swelling / abscess                | 38 (54.3)             |                                                                                 |
| Fall                                            | 14 (20.0)             |                                                                                 |
| Possible broken bone                            | 12 (17.1)             |                                                                                 |
| MVA / other accident                            | 5 (7.1)               |                                                                                 |
| Cut / scrape / bruise                           | 2 (2.9)               |                                                                                 |
| <b>Cardiac</b>                                  |                       | <b>14 (0.9)</b>                                                                 |
| Murmur / other cardiac                          | 14 (100.0)            |                                                                                 |
| <b>Behaviour</b>                                |                       | <b>206 (13.4)</b>                                                               |
| Crying                                          | 135 (65.5)            |                                                                                 |
| Sleeping problem                                | 99 (48.1)             |                                                                                 |
| Lethargy / difficult to wake / acting different | 19 (9.2)              |                                                                                 |
| <b>Skin/dermatologic</b>                        |                       | <b>194 (12.7)</b>                                                               |
| Rash                                            | 82 (42.3)             |                                                                                 |
| Problem with eyes / eye discharge               | 80 (41.2)             |                                                                                 |
| Redness / discharge near cord stump             | 36 (18.6)             |                                                                                 |
| Allergic reaction                               | 7 (3.6)               |                                                                                 |
| Skin or nail colour                             | 4 (2.1)               |                                                                                 |
| <b>Infectious</b>                               |                       | <b>150 (9.8)</b>                                                                |
| Fever                                           | 138 (92.0)            |                                                                                 |
| Thrush                                          | 8 (5.3)               |                                                                                 |
| Infection                                       | 4 (2.7)               |                                                                                 |
| <b>Urinary</b>                                  |                       | <b>106 (6.9)</b>                                                                |
| Problem with urine                              | 85 (80.2)             |                                                                                 |
| Circumcision                                    | 24 (22.6)             |                                                                                 |
| <b>Other</b>                                    |                       | <b>16 (1.0)</b>                                                                 |
| Check up                                        | 4 (25.0)              |                                                                                 |
| Vaginal secretions / bleeding                   | 4 (25.0)              |                                                                                 |
| Syndrome / anomaly                              | 4 (25.0)              |                                                                                 |
| Problems with ear                               | 3 (18.8)              |                                                                                 |
| Doctor referral                                 | 1 (6.2)               |                                                                                 |
| <b>Don't know</b>                               |                       | <b>39 (2.5)</b>                                                                 |

**Table 5: Seriousness of problem versus urgency to be seen**

| Urgency to be seen | Perceived illness severity |      |         |      |              |      |          |      |
|--------------------|----------------------------|------|---------|------|--------------|------|----------|------|
|                    | Not very serious           |      | Serious |      | Very serious |      | Not sure |      |
|                    | n                          | %    | n       | %    | n            | %    | n        | %    |
| Immediately        | 73                         | 30.7 | 219     | 45.8 | 117          | 78.5 | 241      | 37.7 |
| Today              | 125                        | 52.5 | 227     | 47.5 | 28           | 18.8 | 337      | 52.7 |
| Within a few days  | 40                         | 16.8 | 32      | 6.7  | 4            | 2.7  | 61       | 9.5  |

**Table 6: Seriousness of problem versus probability of something bad happening in next 24 hours**

| Will something bad happen if not seen < 24h | Perceived illness severity |      |         |      |              |      |          |      |
|---------------------------------------------|----------------------------|------|---------|------|--------------|------|----------|------|
|                                             | Not very serious           |      | Serious |      | Very serious |      | Not sure |      |
|                                             | n                          | %    | n       | %    | n            | %    | n        | %    |
| Definitely not                              | 33                         | 13.6 | 9       | 1.9  | 1            | 0.7  | 17       | 2.7  |
| Probably not                                | 110                        | 45.5 | 100     | 21.1 | 13           | 8.8  | 125      | 19.9 |
| Probably                                    | 29                         | 12   | 155     | 32.6 | 43           | 29.3 | 96       | 15.3 |
| Definitely                                  | 7                          | 2.9  | 59      | 12.4 | 41           | 27.9 | 18       | 2.9  |
| Don't know                                  | 63                         | 26   | 152     | 32   | 49           | 33.3 | 373      | 59.3 |

**Table 7: Advice/information received by parent/guardian and timing/source**

| Topic                            | Multi-select N (%) | Number of respondents who selected at least one item in this category (%) |
|----------------------------------|--------------------|---------------------------------------------------------------------------|
| <b>How much to feed my baby</b>  |                    | <b>1439 (93.9)</b>                                                        |
| At a class before birth          | 329 (22.9)         |                                                                           |
| In hospital after birth          | 958 (66.6)         |                                                                           |
| From my midwife                  | 158 (11.0)         |                                                                           |
| From my baby's usual doctor      | 311 (21.6)         |                                                                           |
| Previous pregnancy               | 473 (32.9)         |                                                                           |
| No advice                        | 76 (5.3)           |                                                                           |
| <b>How often to feed my baby</b> |                    | <b>1434 (93.5)</b>                                                        |
| At a class before birth          | 319 (22.2)         |                                                                           |
| In hospital after birth          | 993 (69.2)         |                                                                           |
| From my midwife                  | 161 (11.2)         |                                                                           |
| From my baby's usual doctor      | 303 (21.1)         |                                                                           |
| Previous pregnancy               | 473 (33.0)         |                                                                           |
| No advice                        | 47 (3.3)           |                                                                           |

|    |                                                         |            |                    |
|----|---------------------------------------------------------|------------|--------------------|
| 1  |                                                         |            |                    |
| 2  |                                                         |            |                    |
| 3  |                                                         |            |                    |
| 4  | <b>How many wet (urine) diapers to expect per day</b>   |            | <b>1421 (92.7)</b> |
| 5  | At a class before birth                                 | 320 (22.5) |                    |
| 6  | In hospital after birth                                 | 944 (66.4) |                    |
| 7  | From my midwife                                         | 161 (11.3) |                    |
| 8  | From my baby's usual doctor                             | 274 (19.3) |                    |
| 9  | Previous pregnancy                                      | 426 (30.0) |                    |
| 10 | No advice                                               | 82 (5.8)   |                    |
| 11 | <b>How many dirty (stool) diapers to expect per day</b> |            | <b>1424 (92.9)</b> |
| 12 | At a class before birth                                 | 312 (21.9) |                    |
| 13 | In hospital after birth                                 | 943 (66.2) |                    |
| 14 | From my midwife                                         | 166 (11.7) |                    |
| 15 | From my baby's usual doctor                             | 279 (19.6) |                    |
| 16 | Previous pregnancy                                      | 428 (30.1) |                    |
| 17 | No advice                                               | 82 (5.8)   |                    |
| 18 |                                                         |            |                    |
| 19 | <b>Jaundice (yellow skin colouration)</b>               |            | <b>1422 (92.8)</b> |
| 20 | At a class before birth                                 | 220 (15.5) |                    |
| 21 | In hospital after birth                                 | 947 (66.6) |                    |
| 22 | From my midwife                                         | 141 (9.9)  |                    |
| 23 | From my baby's usual doctor                             | 287 (20.2) |                    |
| 24 | Previous pregnancy                                      | 364 (25.6) |                    |
| 25 | No advice                                               | 108 (7.6)  |                    |
| 26 |                                                         |            |                    |
| 27 | <b>Crying and how to comfort my baby</b>                |            | <b>1400 (91.3)</b> |
| 28 | At a class before birth                                 | 299 (21.4) |                    |
| 29 | In hospital after birth                                 | 613 (43.8) |                    |
| 30 | From my midwife                                         | 115 (8.2)  |                    |
| 31 | From my baby's usual doctor                             | 149 (10.6) |                    |
| 32 | Previous pregnancy                                      | 485 (34.6) |                    |
| 33 | No advice                                               | 243 (17.4) |                    |
| 34 | <b>When to see a doctor for well-baby check</b>         |            | <b>1391 (90.7)</b> |
| 35 | At a class before birth                                 | 196 (14.0) |                    |
| 36 | In hospital after birth                                 | 868 (62.0) |                    |
| 37 | From my midwife                                         | 121 (8.6)  |                    |
| 38 | From my baby's usual doctor                             | 314 (22.4) |                    |
| 39 | Previous pregnancy                                      | 369 (26.4) |                    |
| 40 | No advice                                               | 81 (5.8)   |                    |
| 41 |                                                         |            |                    |
| 42 |                                                         |            |                    |
| 43 |                                                         |            |                    |
| 44 |                                                         |            |                    |
| 45 |                                                         |            |                    |
| 46 |                                                         |            |                    |
| 47 |                                                         |            |                    |
| 48 |                                                         |            |                    |
| 49 |                                                         |            |                    |
| 50 |                                                         |            |                    |
| 51 |                                                         |            |                    |
| 52 |                                                         |            |                    |
| 53 |                                                         |            |                    |
| 54 |                                                         |            |                    |
| 55 |                                                         |            |                    |
| 56 |                                                         |            |                    |
| 57 |                                                         |            |                    |
| 58 |                                                         |            |                    |
| 59 |                                                         |            |                    |
| 60 |                                                         |            |                    |
